# Supplementary material
Source: Springer Nature journal article supplement (https://www.springermedizin.de/resource/supplementary/12889_2010_3284_MOESM1_ESM.pdf/9488734)
Supplement: MOESM1 [file 9488734]

(A)

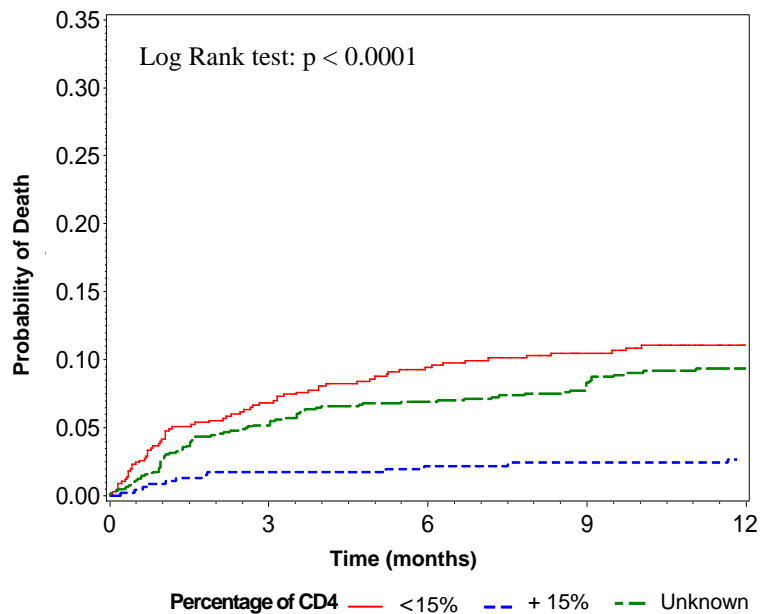

(B)

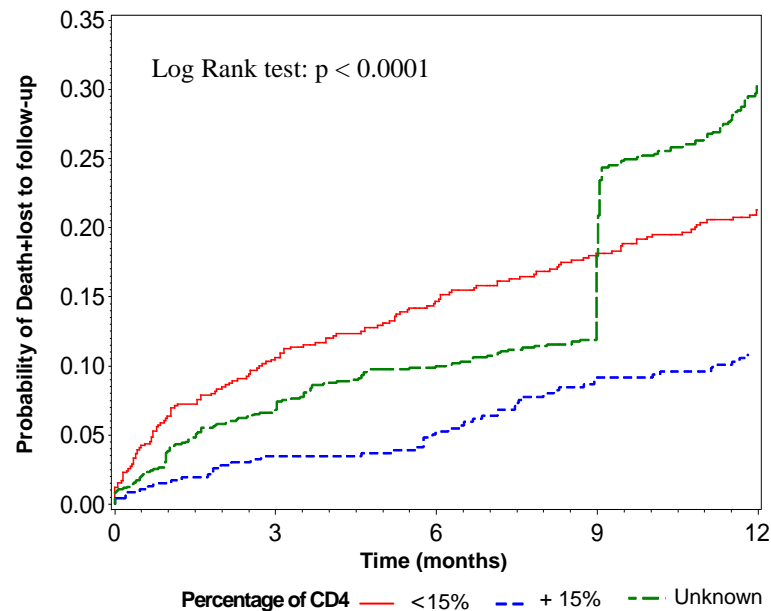

| Percentage of CD4 at baseline | Month-6          |                      | Month-12         |                      | Month-6          |                      | Month-12         |                      |
|-------------------------------|------------------|----------------------|------------------|----------------------|------------------|----------------------|------------------|----------------------|
|                               | Children at risk | Probability (95% CI) |
| <15%                          | 531              | 9.4 (7.4; 12.0)      | 439              | 11.0 (8.8; 13.8)     | 531              | 14.6 (12.2; 17.6)    | 439              | 21.2 (18.2; 24.6)    |
| ≥15%                          | 417              | 2.2 (1.2; 4.0)       | 372              | 2.7 (1.5; 4.7)       | 417              | 5.2 (3.5; 7.7)       | 372              | 10.8 (8.2; 14.1)     |
| Unknown                       | 832              | 6.9 (5.5; 8.7)       | 562              | 9.3 (7.6; 11.4)      | 832              | 10.0 (8.3; 12.0)     | 562              | 30.5 (27.5; 33.6)    |

Baseline: at ART initiation
